# Supplementary material for: Coordination tunes the activity and selectivity of the nitrogen reduction reaction on single-atom iron catalysts: a computational study
Source: Royal Society of Chemistry journal article supplement (doi:10.1039/d0ta09496j), 2020-12-10
Supplement: d0ta09496j1.pdf [file d0ta09496j1.pdf]

## Electronic Supporting Information

### **Coordination Tunes Activity and Selectivity of Nitrogen Reduction Reaction on Single-Atom Iron Catalysts: A Computational Study**

Dongxu Jiao,<sup>a</sup> Yuejie Liu,<sup>b,\*</sup> Qinghai Cai,<sup>a,b</sup> Jingxiang Zhao<sup>a,\*</sup>

<sup>a</sup> College of Chemistry and Chemical Engineering, and Key Laboratory of Photonic and Electronic Bandgap Materials, Ministry of Education, Harbin Normal University, Harbin, 150025, China

<sup>b</sup> Modern Experiment Center, Harbin Normal University, Harbin, 150025, China

\*To whom correspondence should be addressed. Email: zjx1103@hotmail.com (YL) ;

xjz\_hmily@163.com or zhaojingxiang@hrbnu.edu.cn (JZ)

## Computational Details on Free Energy Changes

The widely-accepted computational hydrogen electrode (CHE) model<sup>1,2</sup> was used to compute the change in the Gibbs free energy change ( $\Delta G$ ) for all NRR steps, in which one-half of the chemical potential of hydrogen molecule is equal to the chemical potential of proton-electron pair. In this CHE model, the  $\Delta G$  value of each elementary step in NRR can be obtained by:  $\Delta G = \Delta E + \Delta E_{ZPE} - T\Delta S + \Delta G_{pH} + \Delta G_U$ , where  $\Delta E$  that represents the reaction energy difference of reactant and product, which can be directly computed from DFT computations.  $\Delta E_{ZPE}$  and  $\Delta S$  are the change in the zero-point energies and entropy at room temperature ( $T = 298.15\text{K}$ ), which can be computed from the vibrational frequencies. Notably, the entropies of the free molecules, including  $\text{N}_2$ ,  $\text{NH}_3$ , and  $\text{H}_2$ , were taken from the NIST database.  $\Delta G_{pH}$  is the free energy correction of pH, which can be determined as:  $\Delta G_{pH} = k_B T \times \text{pH} \times \ln 10$ , and in this work the pH value was set to be zero.  $\Delta G_U = -eU$ , where  $e$  is the transferred charge and  $U$  represents the applied potential at the electrode. The limiting potential ( $U_L$ ) was employed to assess the NRR catalytic activity, which can be computed by:  $U_L = -\max(\Delta G_1, \Delta G_2, \Delta G_3, \Delta G_4, \dots, \Delta G_i)/e$ , where  $\Delta G_i$  represents the free energy change of each elementary step in the whole NRR process. According to this definition, a less negative  $U_L$  on a given catalyst denotes a less energy input, thus suggesting its higher NRR catalytic activity.

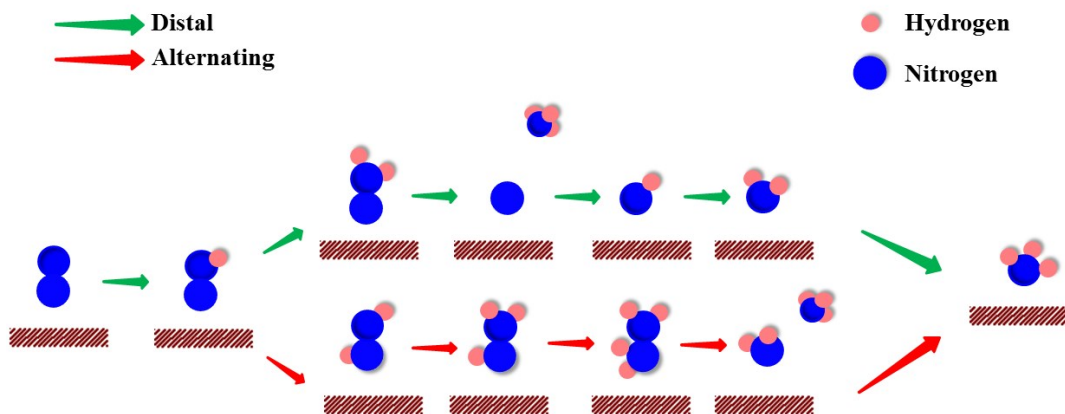

**Scheme S1.** The involved reaction pathways for NRR on B-doped Fe-N<sub>4</sub>/G

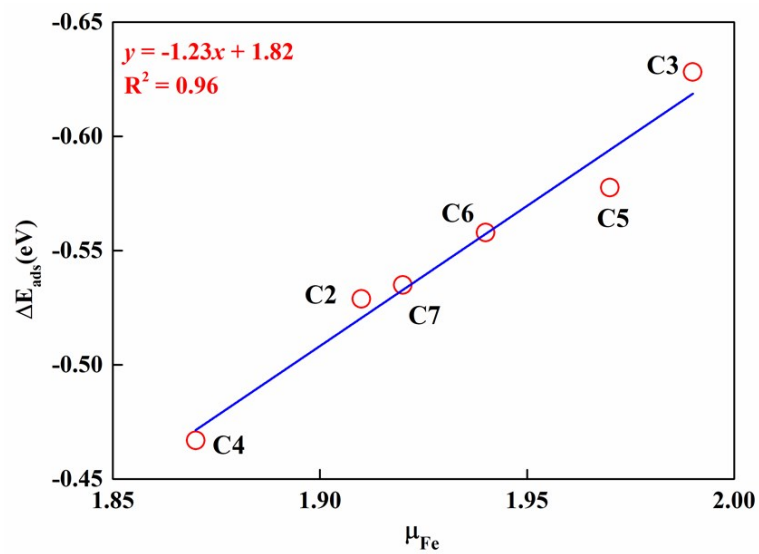

**Fig. S1.** The scaling relationship between adsorption energy ( $E_{\text{ads}}$ ) of  $\text{N}_2$  molecule and spin moment of the central Fe atom ( $\mu_{\text{Fe}}$ ).

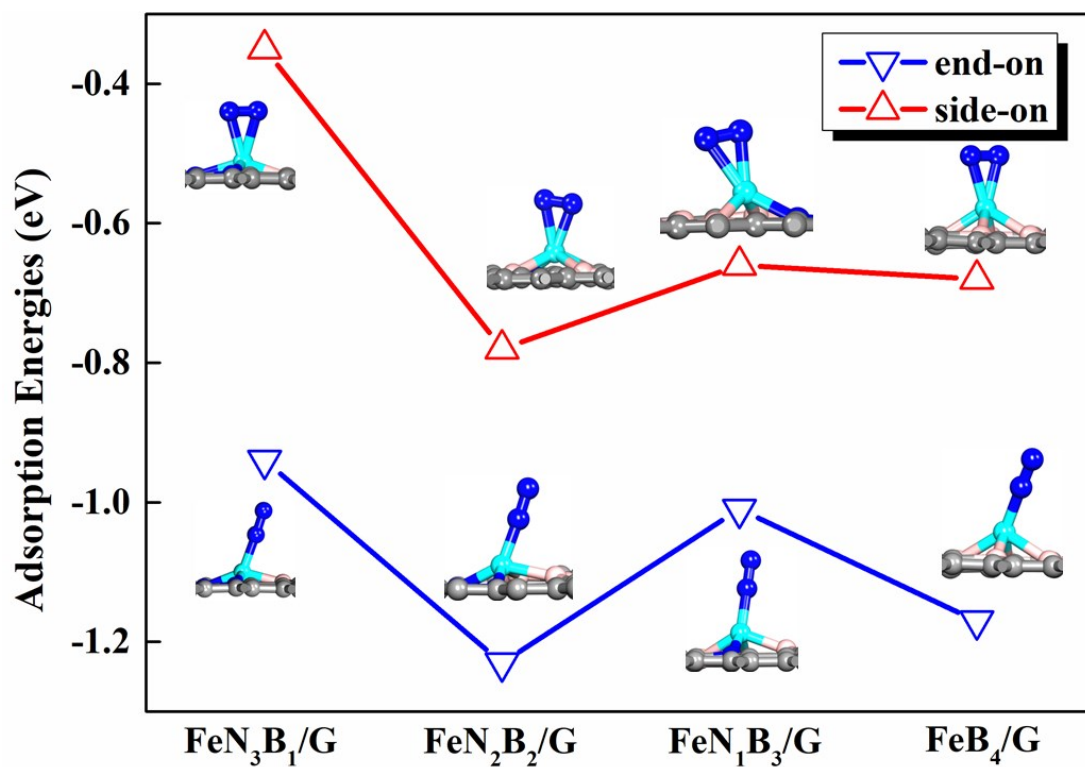

Fig. S2. The optimized adsorption configurations of N<sub>2</sub> molecule on Fe-B<sub>x</sub>N<sub>4-x</sub>/G in end-on and side-on patterns and the corresponding adsorption energies.

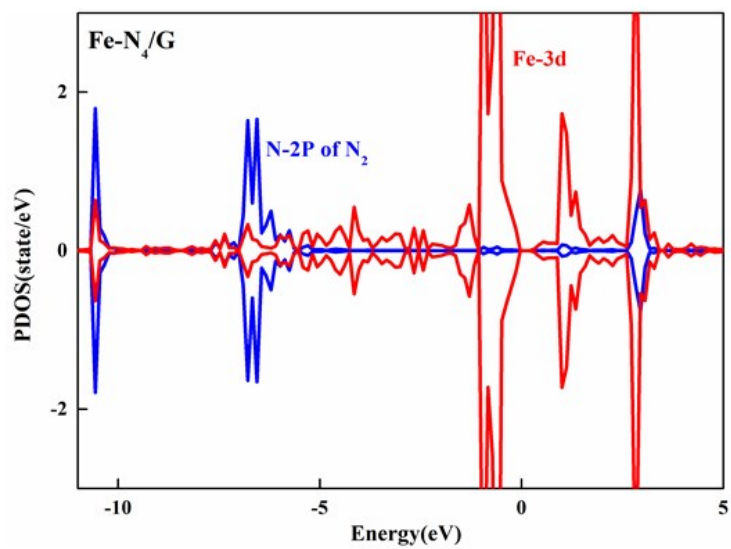

**Fig. S3.** The computed partial density of states of N<sub>2</sub> adsorption on pristine Fe-N<sub>4</sub>/G.

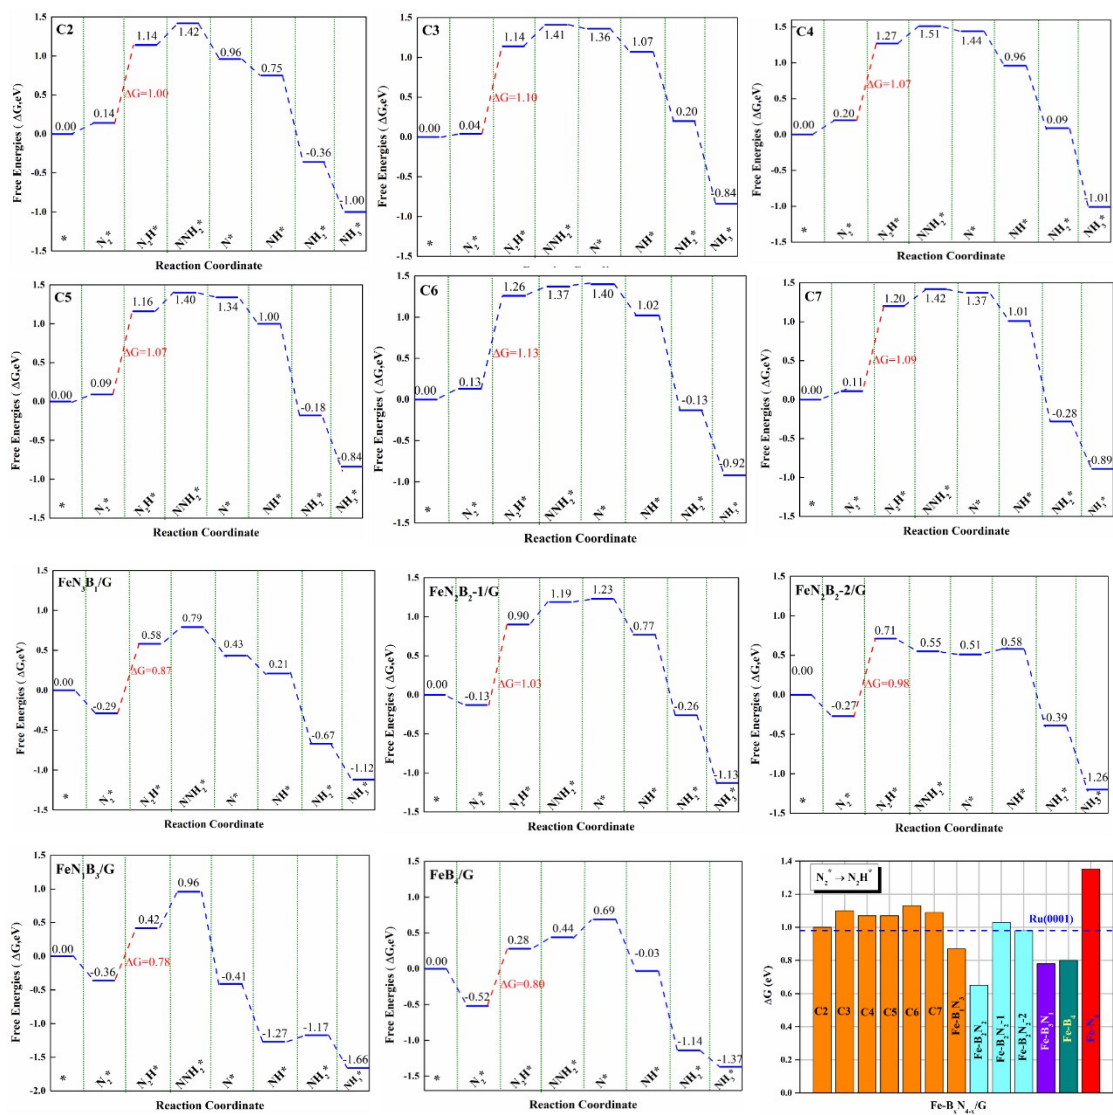

**Fig. S4.** The obtained free energy profiles of NRR on various Fe-B<sub>x</sub>N<sub>4-x</sub>/G systems along distal pathways, and the computed ΔG values for N<sub>2</sub>\* → N<sub>2</sub>H\*.

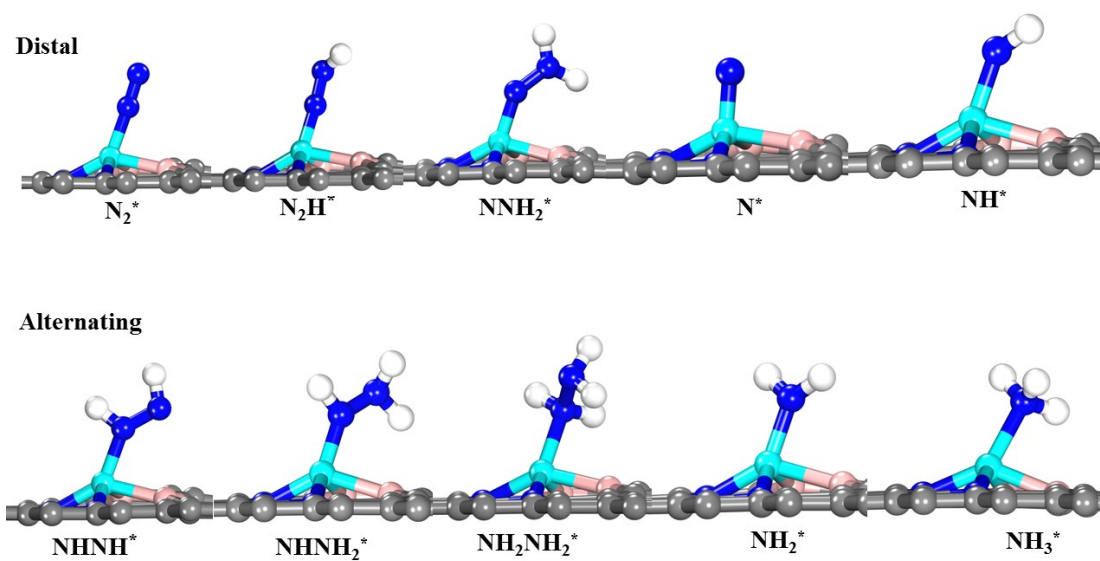

**Fig. S5.** The involved NRR intermediates on Fe-B<sub>1</sub>N<sub>3</sub>/G along distal and alternative pathways.



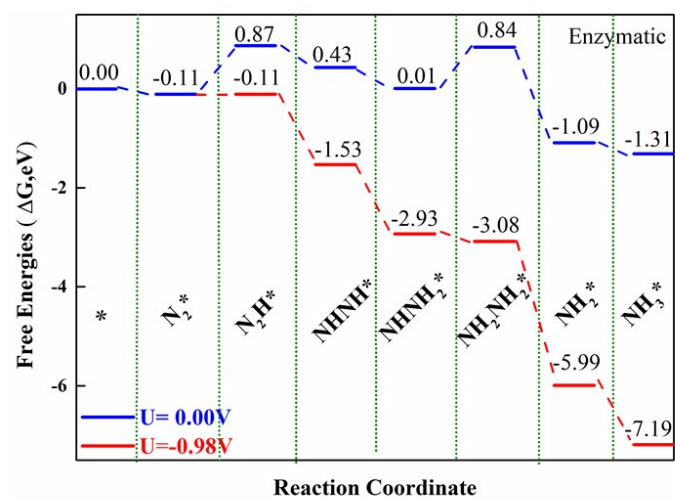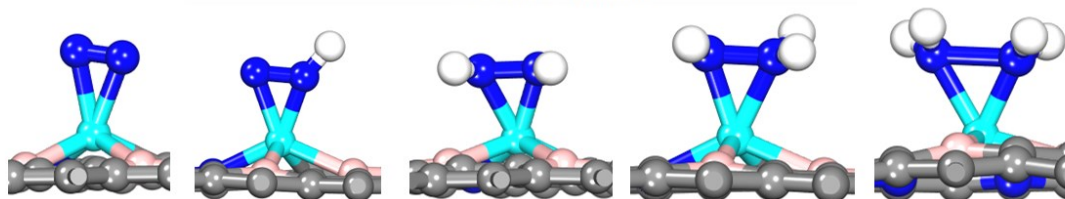

**Fig. S6.** The computed free energy profiles for NRR on Fe-B<sub>2</sub>N<sub>2</sub>/G along enzymatic pathway, and the involved reaction intermediates.

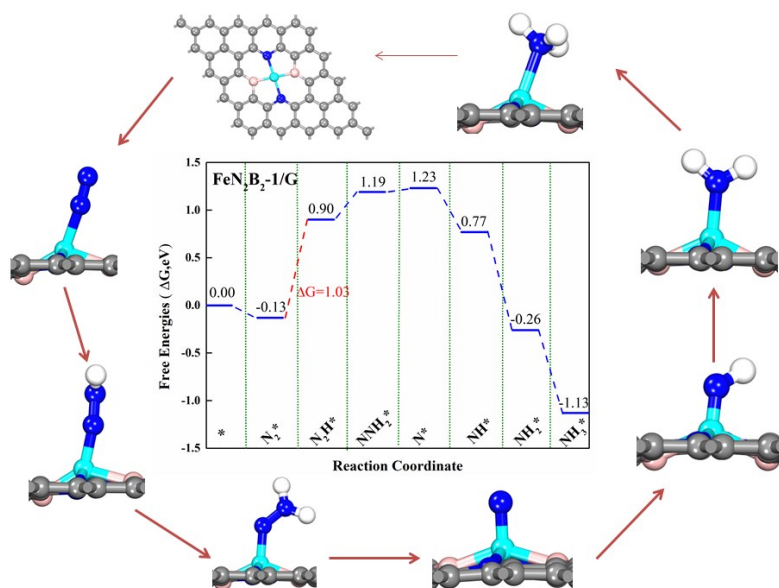

(a)

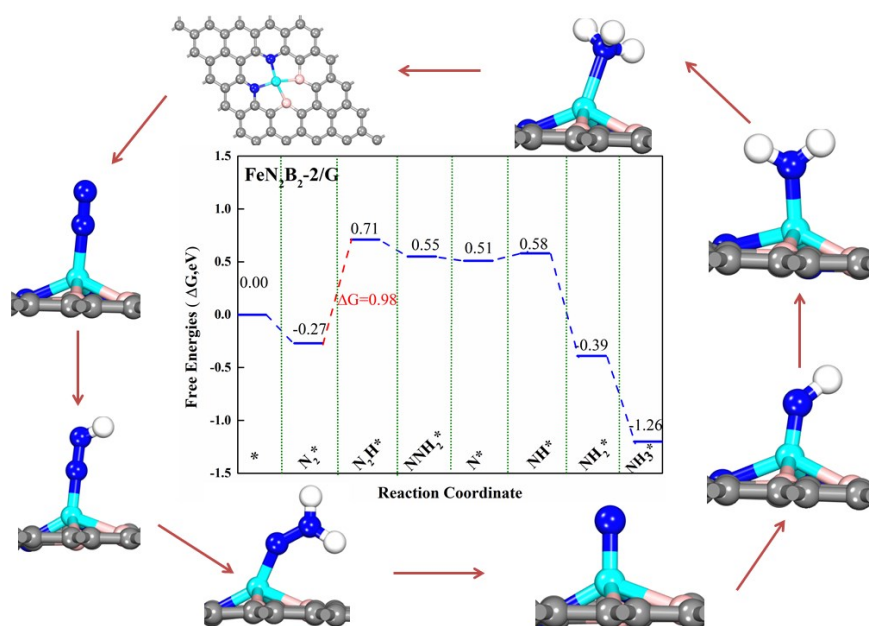

(b)

**Fig. S7.** The computed free energy profiles of NRR on (a) Fe-B<sub>2</sub>N<sub>2</sub>-1 and (b) Fe-B<sub>2</sub>N<sub>2</sub>-2, and the corresponding NRR intermediates.

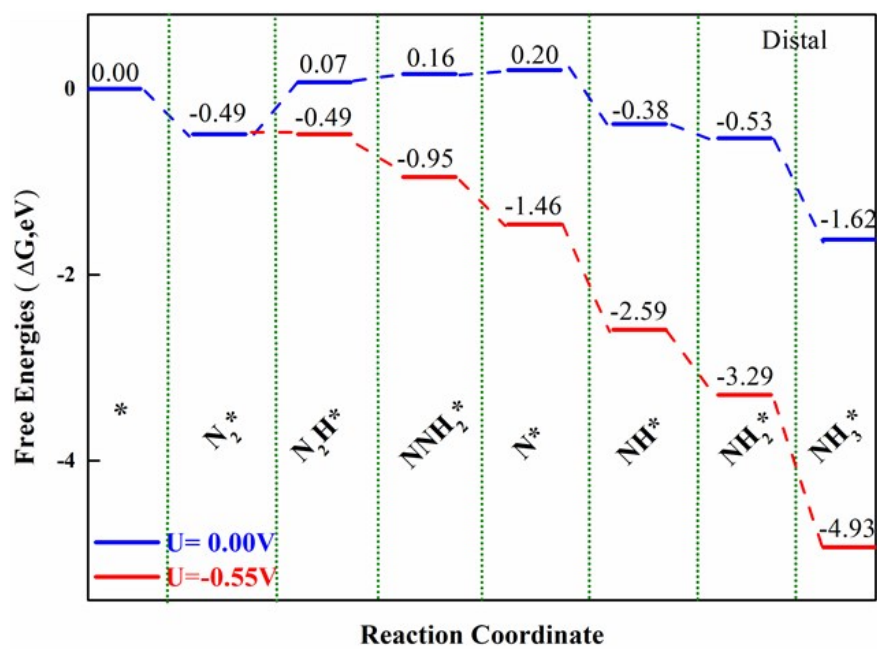

**Fig. S8.** Gibbs free energy ( $\Delta G$ ) diagram for NRR on Fe-B<sub>2</sub>N<sub>2</sub>/G with solvent effect.

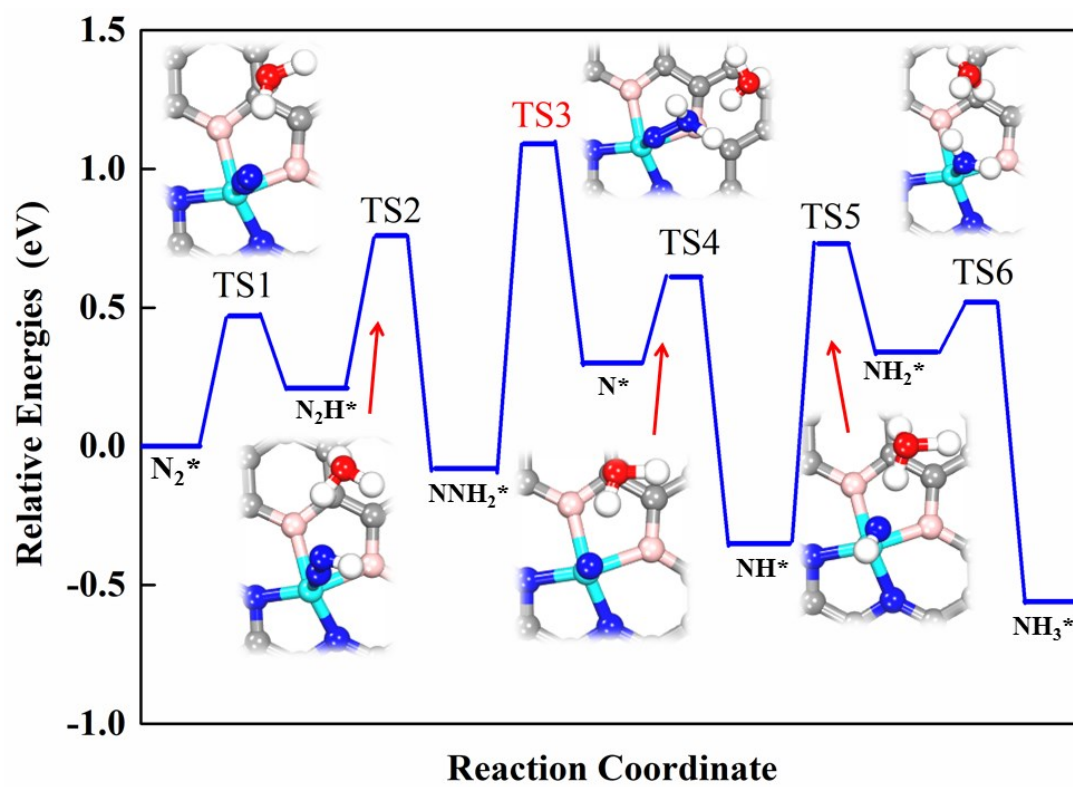

**Fig. S9.** The computed minimum energy path for  $N_2$  reduction to  $NH_3$ , and the corresponding structures of transition states (TSs).

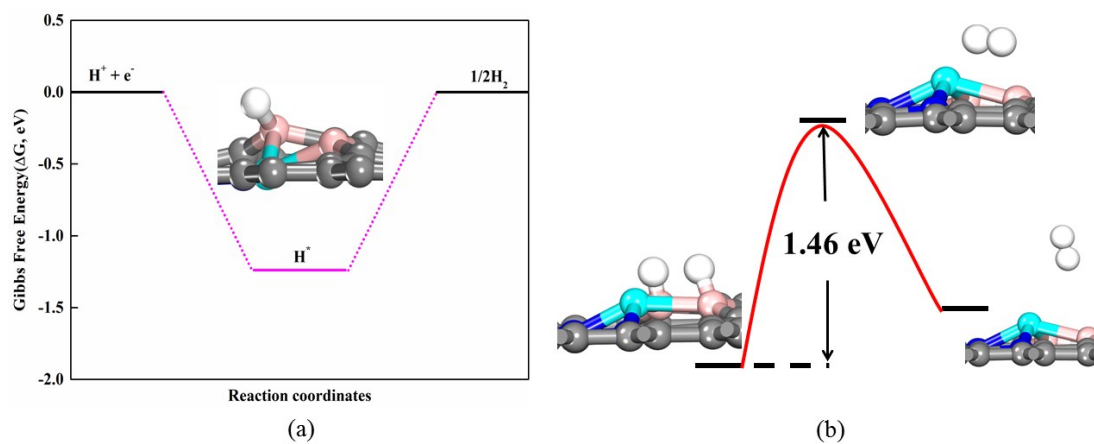

**Fig. S10.** The computed (a) free energy profile and (b) minimum energy path for HER on Fe-B<sub>2</sub>N<sub>2</sub>/G.

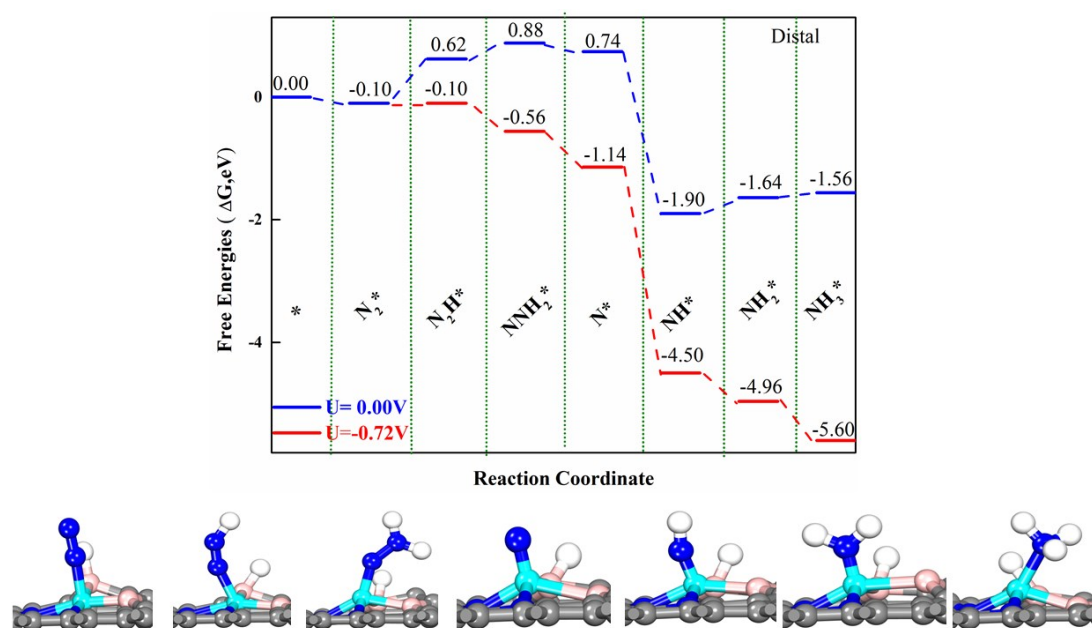

**Fig. S11.** Gibbs free energy ( $\Delta G$ ) diagram for NRR on Fe-B<sub>2</sub>N<sub>2</sub>/G with H-preadsorption on B site.

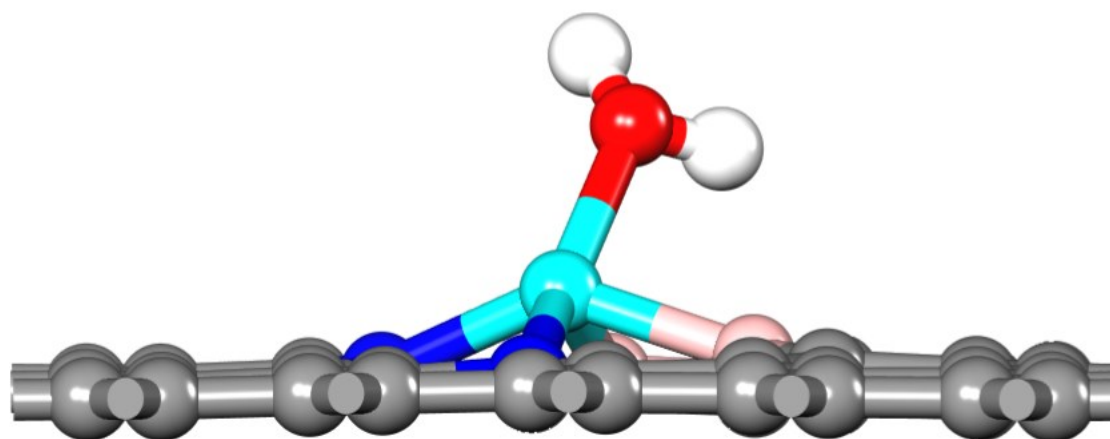

**Fig. S12.** The optimized adsorption configuration for H<sub>2</sub>O on Fe-B<sub>2</sub>N<sub>2</sub>/G.

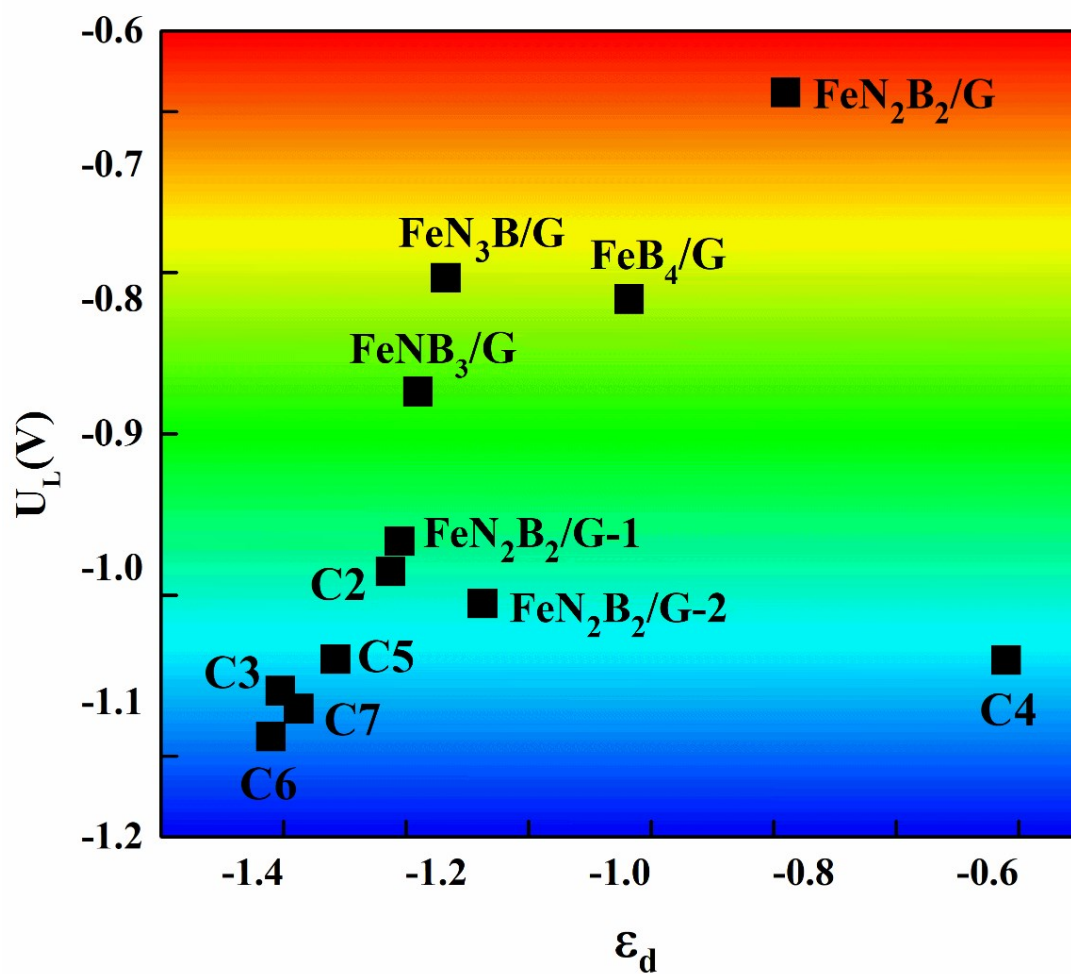

**Fig. S13.** The scaling relationships of limiting potential of NRR ( $U_L$ ) vs d-band center ( $\epsilon_d$ ) of the central Fe atoms.



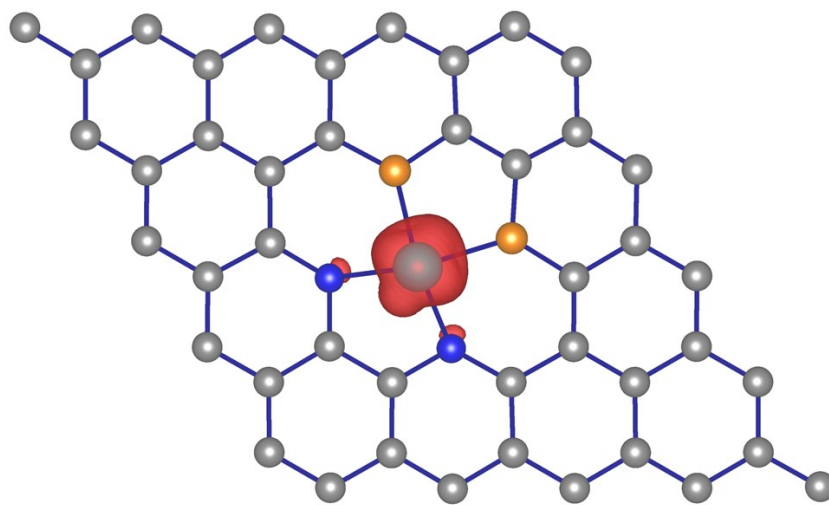

**Fig. S14.** The spin density of Fe-B<sub>2</sub>N<sub>2</sub>/G. The isosurface value was set as 0.01 e/Å<sup>2</sup>.

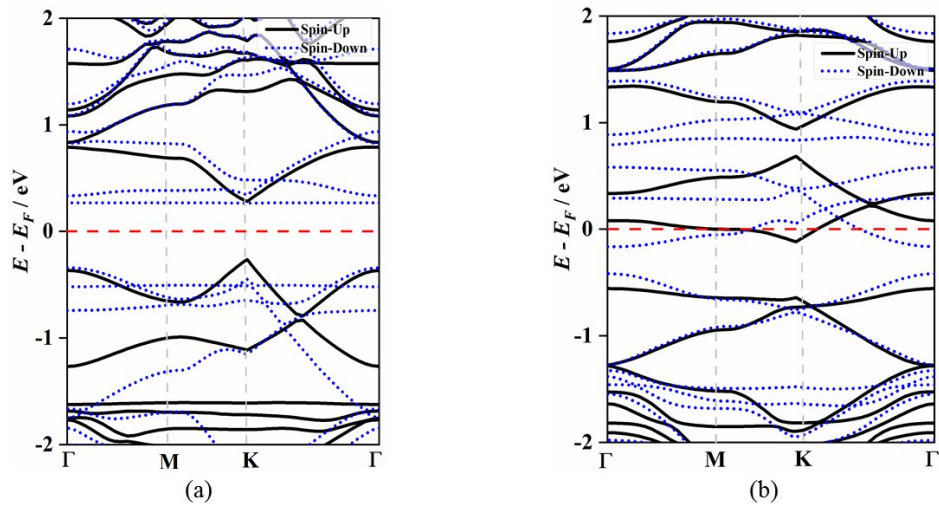

**Fig. S15.** The computed band structures of (a) Fe-N<sub>4</sub>/G and (b) Fe-B<sub>2</sub>N<sub>2</sub>/G. The Fermi level was set to zero in red dotted line.

## References

1. J. K. Nørskov, J. Rossmeisl, A. Logadottir, L. Lindqvist, J. R. Kitchin, T. Bligaard and H. Jonsson, *J. Phys. Chem. B*, 2004, 108, 17886-17892.
2. A. A. Peterson, F. Abild-Pedersen, F. Studt, J. Rossmeisl and J. K. Nørskov, *Energy & Environ. Sci.*, 2010, 3, 1311-1315.
- 3.
